# Supplementary material for: Vibrational Spectroscopy of Peritoneal Dialysis Effluent for Rapid Assessment of Patient Characteristics
Source: PubMed Central journal article supplement (PMC7357123; doi:10.3390/biom10060965), 2020-06-26
Supplement: biomolecules-10-00965-s001.pdf [file biomolecules-10-00965-s001.pdf]

## Supplementary Materials:

# Vibrational Spectroscopy of Peritoneal Dialysis Effluent for Rapid Assessment of Patient Characteristics

**Tom Grunert**<sup>1,\*†</sup>, **Rebecca Herzog**<sup>2,3</sup>, **Florian M. Wiesenhofer**<sup>2,3</sup>, **Andreas Vychytil**<sup>4</sup>,  
**Monika Ehling-Schulz**<sup>1</sup>, and **Klaus Kratochwill**<sup>2,3,\*†</sup>

<sup>1</sup> Functional Microbiology, Institute of Microbiology, Department of Pathobiology, University of Veterinary Medicine, Veterinärplatz 1, 1210 Vienna, Austria

<sup>2</sup> Christian Doppler Laboratory for Molecular Stress Research in Peritoneal Dialysis, Department of Pediatrics and Adolescent Medicine, Medical University of Vienna, 1090 Vienna, Austria

<sup>3</sup> Division of Pediatric Nephrology and Gastroenterology, Department of Pediatrics and Adolescent Medicine, Comprehensive Center for Pediatrics, Medical University of Vienna, 1090 Vienna, Austria

<sup>4</sup> Division of Nephrology and Dialysis, Department of Medicine III, Medical University of Vienna, 1090 Vienna, Austria

\* Correspondence: tom.grunert@vetmeduni.ac.at (T.G.); klaus.kratochwill@meduniwien.ac.at (K.K.)

† Contributed equally.

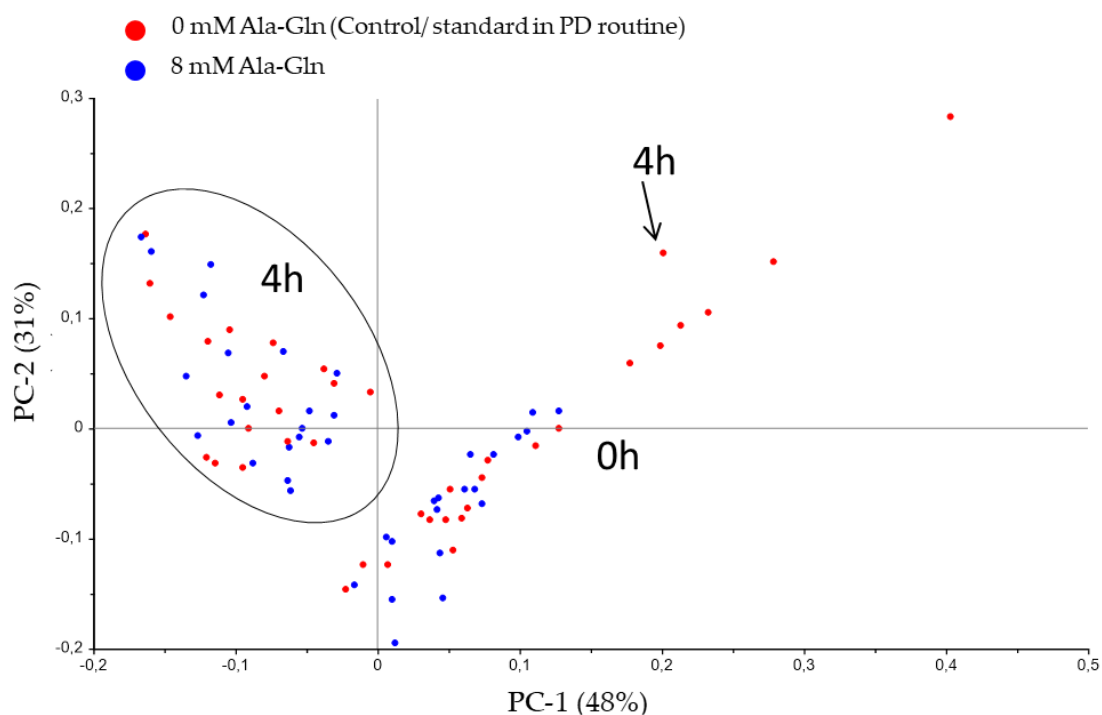

Unsupervised PCA score plot based on FTIR spectra recorded from patient PD fluid examining the polysaccharide spectral region ( $1200\text{--}800\text{cm}^{-1}$ ) for data analysis. PC1 was plotted against PC2. Samples derived at time point 4h can be clearly separated from samples at time point 0h, but no discrimination was obtained between spectra derived from PD fluids of Ala-Gln treated and non-treated patients.

**Figure S1.** PCA score plot from FTIR data based on the polysaccharide spectral region ( $1200\text{--}800\text{cm}^{-1}$ ). The equivalent score plot for the protein region is provided in Figure 3a.

**Table S1.** Confusion matrix incl. classification rates of patient-related data (balanced).

| Spectral range:<br>Classifier: | Protein region (1800-1500 cm <sup>-1</sup> ) |       |              |        | Polysaccharide region (1200-800 cm <sup>-1</sup> ) |       |              |        |
|--------------------------------|----------------------------------------------|-------|--------------|--------|----------------------------------------------------|-------|--------------|--------|
|                                | PCA-LDA                                      |       | PCA-MDA      |        | PCA-LDA                                            |       | PCA-MDA      |        |
| <b>Age (&lt;60/ ≥60 years)</b> |                                              |       |              |        |                                                    |       |              |        |
| <b>control, 4h (n=20)</b>      | Actual                                       |       | Actual       |        | Actual                                             |       | Actual       |        |
| Predicted                      | ≥60                                          | <60   | ≥60          | <60    | ≥60                                                | <60   | ≥60          | <60    |
| ≥60                            | 8                                            | 2     | 10           | 0      | 10                                                 | 1     | 10           | 0      |
| <60                            | 2                                            | 8     | 0            | 10     | 0                                                  | 9     | 0            | 10     |
| Accuracy %                     | 80,0                                         | 80,0  | 100,0        | 100,0  | 100,0                                              | 90,0  | 100,0        | 100,0  |
| <b>Overall accuracy %</b>      | <b>80,0</b>                                  |       | <b>100,0</b> |        | <b>95,0</b>                                        |       | <b>100,0</b> |        |
| <b>all, 4h (n=40)</b>          | Actual                                       |       | Actual       |        | Actual                                             |       | Actual       |        |
| Predicted                      | ≥60                                          | <60   | ≥60          | <60    | ≥60                                                | <60   | ≥60          | <60    |
| ≥60                            | 13                                           | 5     | 13           | 6      | 12                                                 | 3     | 14           | 10     |
| <60                            | 7                                            | 15    | 7            | 14     | 8                                                  | 17    | 6            | 10     |
| Accuracy %                     | 65,0                                         | 75,0  | 65,0         | 70,0   | 60,0                                               | 85,0  | 70,0         | 50,0   |
| <b>Overall accuracy %</b>      | <b>70,0</b>                                  |       | <b>67,5</b>  |        | <b>72,5</b>                                        |       | <b>60,0</b>  |        |
| <b>Sex (female/ male)</b>      |                                              |       |              |        |                                                    |       |              |        |
| <b>control, 4h (n=20)</b>      | Actual                                       |       | Actual       |        | Actual                                             |       | Actual       |        |
| Predicted                      | female                                       | male  | female       | male   | female                                             | male  | female       | male   |
| female                         | 5                                            | 2     | 2            | 0      | 5                                                  | 2     | 3            | 0      |
| male                           | 2                                            | 11    | 5            | 13     | 2                                                  | 11    | 4            | 13     |
| Accuracy %                     | 71,43                                        | 84,62 | 28,57        | 100,00 | 71,43                                              | 84,62 | 42,86        | 100,00 |
| <b>Overall accuracy %</b>      | <b>78,0</b>                                  |       | <b>64,3</b>  |        | <b>78,0</b>                                        |       | <b>71,4</b>  |        |
| <b>all, 4h (n=40)</b>          | Actual                                       |       | Actual       |        | Actual                                             |       | Actual       |        |
| Predicted                      | female                                       | male  | female       | male   | female                                             | male  | female       | male   |
| female                         | 8                                            | 14    | 8            | 4      | 8                                                  | 14    | 5            | 8      |
| male                           | 8                                            | 10    | 8            | 20     | 8                                                  | 10    | 11           | 16     |
| Accuracy %                     | 50,00                                        | 41,67 | 50,00        | 83,33  | 50,00                                              | 41,67 | 31,25        | 66,67  |
| <b>Overall accuracy %</b>      | <b>45,8</b>                                  |       | <b>66,7</b>  |        | <b>45,8</b>                                        |       | <b>49,0</b>  |        |

**Table S2.** Confusion matrix incl. classification rates of PD-related data (balanced).

| Spectral range:<br>Classifier:     | Protein region (1800-1500 cm <sup>-1</sup> ) |            |              |            | Polysaccharide region (1200-800 cm <sup>-1</sup> ) |            |             |            |
|------------------------------------|----------------------------------------------|------------|--------------|------------|----------------------------------------------------|------------|-------------|------------|
|                                    | PCA-LDA                                      |            | PCA-MDA      |            | PCA-LDA                                            |            | PCA-MDA     |            |
| <b>Modality (CAPD/ APD-Cycler)</b> |                                              |            |              |            |                                                    |            |             |            |
| <b>control, 4h (n=20)</b>          |                                              |            |              |            |                                                    |            |             |            |
| Predicted                          | Actual                                       |            | Actual       |            | Actual                                             |            | Actual      |            |
|                                    | CAPD                                         | APD-Cycler | CAPD         | APD-Cycler | CAPD                                               | APD-Cycler | CAPD        | APD-Cycler |
| CAPD                               | 8                                            | 2          | 10           | 2          | 9                                                  | 0          | 10          | 1          |
| APD-Cycler                         | 2                                            | 8          | 0            | 8          | 1                                                  | 10         | 0           | 9          |
| Accuracy %                         | 80,0                                         | 80,0       | 100,0        | 80,0       | 90,0                                               | 100,0      | 100,0       | 90,0       |
| <b>Overall accuracy %</b>          | <b>80,0</b>                                  |            | <b>90,0</b>  |            | <b>95,0</b>                                        |            | <b>95,0</b> |            |
| <b>all, 4h (n=40)</b>              |                                              |            |              |            |                                                    |            |             |            |
| Predicted                          | Actual                                       |            | Actual       |            | Actual                                             |            | Actual      |            |
|                                    | CAPD                                         | APD-Cycler | CAPD         | APD-Cycler | CAPD                                               | APD-Cycler | CAPD        | APD-Cycler |
| CAPD                               | 18                                           | 3          | 18           | 7          | 15                                                 | 4          | 17          | 4          |
| APD-Cycler                         | 2                                            | 17         | 2            | 13         | 5                                                  | 16         | 3           | 16         |
| Accuracy %                         | 90,0                                         | 85,0       | 90,0         | 65,0       | 75,0                                               | 80,0       | 85,0        | 80,0       |
| <b>Overall accuracy %</b>          | <b>87,5</b>                                  |            | <b>77,5</b>  |            | <b>77,5</b>                                        |            | <b>82,5</b> |            |
| <b>Glucose/ Icodextrin</b>         |                                              |            |              |            |                                                    |            |             |            |
| <b>control, 4h (n=20)</b>          |                                              |            |              |            |                                                    |            |             |            |
| Predicted                          | Actual                                       |            | Actual       |            | Actual                                             |            | Actual      |            |
|                                    | Glucose                                      | Icodextrin | Glucose      | Icodextrin | Glucose                                            | Icodextrin | Glucose     | Icodextrin |
| Glucose                            | n.D.                                         |            | n.D.         |            | n.D.                                               |            | n.D.        |            |
| Icodextrin                         | n.D.                                         |            | n.D.         |            | n.D.                                               |            | n.D.        |            |
| Accuracy %                         |                                              |            |              |            |                                                    |            |             |            |
| <b>Overall accuracy %</b>          |                                              |            |              |            |                                                    |            |             |            |
| <b>all, 4h (n=40)</b>              |                                              |            |              |            |                                                    |            |             |            |
| Predicted                          | Actual                                       |            | Actual       |            | Actual                                             |            | Actual      |            |
|                                    | Glucose                                      | Icodextrin | Glucose      | Icodextrin | Glucose                                            | Icodextrin | Glucose     | Icodextrin |
| Glucose                            | 25                                           | 4          | 32           | 8          | 28                                                 | 2          | 32          | 8          |
| Icodextrin                         | 7                                            | 4          | 0            | 0          | 4                                                  | 6          | 0           | 0          |
| Accuracy %                         | 78,13                                        | 50,00      | 100,00       | 0,00       | 87,50                                              | 75,00      | 100,00      | 0,00       |
| <b>Overall accuracy %</b>          | <b>64,1</b>                                  |            | <b>50,0</b>  |            | <b>81,3</b>                                        |            | <b>50,0</b> |            |
| <b>Time on PD (&lt;1/ ≥1 year)</b> |                                              |            |              |            |                                                    |            |             |            |
| <b>control, 4h (n=20)</b>          |                                              |            |              |            |                                                    |            |             |            |
| Predicted                          | Actual                                       |            | Actual       |            | Actual                                             |            | Actual      |            |
|                                    | <1 year                                      | ≥1 year    | <1 year      | ≥1 year    | <1 year                                            | ≥1 year    | <1 year     | ≥1 year    |
| <1 year                            | n.D.                                         |            | n.D.         |            | n.D.                                               |            | n.D.        |            |
| ≥1 year                            | n.D.                                         |            | n.D.         |            | n.D.                                               |            | n.D.        |            |
| Accuracy %                         |                                              |            |              |            |                                                    |            |             |            |
| <b>Overall accuracy %</b>          |                                              |            |              |            |                                                    |            |             |            |
| <b>all, 4h (n=40)</b>              |                                              |            |              |            |                                                    |            |             |            |
| Predicted                          | Actual                                       |            | Actual       |            | Actual                                             |            | Actual      |            |
|                                    | <1 year                                      | ≥1 year    | <1 year      | ≥1 year    | <1 year                                            | ≥1 year    | <1 year     | ≥1 year    |
| <1 year                            | 6                                            | 7          | 0            | 9          | 5                                                  | 5          | 0           | 2          |
| ≥1 year                            | 4                                            | 23         | 10           | 21         | 5                                                  | 25         | 10          | 28         |
| Accuracy %                         | 60,00                                        | 76,67      | 0,00         | 70,00      | 50,00                                              | 83,33      | 0,00        | 93,33      |
| <b>Overall accuracy %</b>          | <b>68,3</b>                                  |            | <b>35,0</b>  |            | <b>66,7</b>                                        |            | <b>46,7</b> |            |
| <b>UrinVolOut (&lt;≥1000 mL)</b>   |                                              |            |              |            |                                                    |            |             |            |
| <b>control, 4h (n=20)</b>          |                                              |            |              |            |                                                    |            |             |            |
| Predicted                          | Actual                                       |            | Actual       |            | Actual                                             |            | Actual      |            |
|                                    | <1000 mL                                     | ≥1000 mL   | <1000 mL     | ≥1000 mL   | <1000 mL                                           | ≥1000 mL   | <1000 mL    | ≥1000 mL   |
| <1000 mL                           | 12                                           | 1          | 12           | 0          | 9                                                  | 2          | 12          | 1          |
| ≥1000 mL                           | 0                                            | 7          | 0            | 8          | 3                                                  | 6          | 0           | 7          |
| Accuracy %                         | 100,00                                       | 87,50      | 100,00       | 100,00     | 75,00                                              | 75,00      | 100,00      | 87,50      |
| <b>Overall accuracy %</b>          | <b>93,8</b>                                  |            | <b>100,0</b> |            | <b>75,0</b>                                        |            | <b>93,8</b> |            |
| <b>all, 4h (n=40)</b>              |                                              |            |              |            |                                                    |            |             |            |
| Predicted                          | Actual                                       |            | Actual       |            | Actual                                             |            | Actual      |            |
|                                    | <1000 mL                                     | ≥1000 mL   | <1000 mL     | ≥1000 mL   | <1000 mL                                           | ≥1000 mL   | <1000 mL    | ≥1000 mL   |
| <1000 mL                           | 20                                           | 7          | 13           | 2          | 12                                                 | 12         | 11          | 2          |
| ≥1000 mL                           | 4                                            | 9          | 11           | 14         | 4                                                  | 12         | 13          | 14         |
| Accuracy %                         | 83,33                                        | 56,25      | 54,17        | 87,50      | 75,00                                              | 50,00      | 45,83       | 87,50      |
| <b>Overall accuracy %</b>          | <b>69,8</b>                                  |            | <b>70,8</b>  |            | <b>62,5</b>                                        |            | <b>66,7</b> |            |

(continued - next page)

Table S2. Cont.

| Spectral range:<br>Classifier:                      | Protein region (1800-1500 cm <sup>-1</sup> ) |          |             |          | Polysaccharide region (1200-800 cm <sup>-1</sup> ) |          |              |          |
|-----------------------------------------------------|----------------------------------------------|----------|-------------|----------|----------------------------------------------------|----------|--------------|----------|
|                                                     | PCA-LDA                                      |          | PCA-MDA     |          | PCA-LDA                                            |          | PCA-MDA      |          |
| <b>UF (&lt;≥550 mL)</b>                             |                                              |          |             |          |                                                    |          |              |          |
| <b>control, 4h (n=20)</b>                           | Actual                                       |          | Actual      |          | Actual                                             |          | Actual       |          |
| Predicted                                           | <550 mL                                      | ≥550 mL  | <550 mL     | ≥550 mL  | <550 mL                                            | ≥550 mL  | <550 mL      | ≥550 mL  |
| <550 mL                                             | 8                                            | 3        | 9           | 0        | 9                                                  | 1        | 10           | 0        |
| ≥550 mL                                             | 2                                            | 7        | 1           | 10       | 1                                                  | 9        | 0            | 10       |
| Accuracy %                                          | 80,00                                        | 70,00    | 90,00       | 100,00   | 90,00                                              | 90,00    | 100,00       | 100,00   |
| <b>Overall accuracy %</b>                           | <b>75,0</b>                                  |          | <b>95,0</b> |          | <b>90,0</b>                                        |          | <b>100,0</b> |          |
| <b>all, 4h (n=40)</b>                               | Actual                                       |          | Actual      |          | Actual                                             |          | Actual       |          |
| Predicted                                           | <550 mL                                      | ≥550 mL  | <550 mL     | ≥550 mL  | <550 mL                                            | ≥550 mL  | <550 mL      | ≥550 mL  |
| <550 mL                                             | 17                                           | 9        | 14          | 7        | 14                                                 | 6        | 14           | 9        |
| ≥550 mL                                             | 5                                            | 9        | 8           | 11       | 8                                                  | 12       | 8            | 9        |
| Accuracy %                                          | 77,27                                        | 50,00    | 63,64       | 61,11    | 63,64                                              | 66,67    | 63,64        | 50,00    |
| <b>Overall accuracy %</b>                           | <b>63,6</b>                                  |          | <b>62,4</b> |          | <b>65,2</b>                                        |          | <b>56,8</b>  |          |
| <b>ResidualCI (&lt;≥3 mL/min/1.73m<sup>2</sup>)</b> |                                              |          |             |          |                                                    |          |              |          |
| <b>control, 4h (n=20)</b>                           | Actual                                       |          | Actual      |          | Actual                                             |          | Actual       |          |
| Predicted                                           | <3 *)                                        | ≥3 *)    | <3 *)       | ≥3 *)    | <3 *)                                              | ≥3 *)    | <3 *)        | ≥3 *)    |
| <3 mL/min/1.73m <sup>2</sup> *)                     | 12                                           | 1        | 13          | 2        | 11                                                 | 2        | 13           | 6        |
| ≥3 mL/min/1.73m <sup>2</sup> *)                     | 1                                            | 6        | 0           | 5        | 2                                                  | 5        | 0            | 1        |
| Accuracy %                                          | 92,31                                        | 85,71    | 100,00      | 71,43    | 84,62                                              | 71,43    | 100,00       | 14,29    |
| <b>Overall accuracy %</b>                           | <b>89,0</b>                                  |          | <b>85,7</b> |          | <b>78,0</b>                                        |          | <b>57,1</b>  |          |
| <b>all, 4h (n=40)</b>                               | Actual                                       |          | Actual      |          | Actual                                             |          | Actual       |          |
| Predicted                                           | <3 *)                                        | ≥3 *)    | <3 *)       | ≥3 *)    | <3 *)                                              | ≥3 *)    | <3 *)        | ≥3 *)    |
| <3 mL/min/1.73m <sup>2</sup> *)                     | 22                                           | 7        | 14          | 2        | 22                                                 | 13       | 11           | 2        |
| ≥3 mL/min/1.73m <sup>2</sup> *)                     | 3                                            | 8        | 11          | 13       | 3                                                  | 2        | 14           | 13       |
| Accuracy %                                          | 88,00                                        | 53,33    | 56,00       | 86,67    | 88,00                                              | 13,33    | 44,00        | 86,67    |
| <b>Overall accuracy %</b>                           | <b>70,7</b>                                  |          | <b>71,3</b> |          | <b>50,7</b>                                        |          | <b>65,3</b>  |          |
| <b>DP Crea (&lt;≥ 0.8 (-))</b>                      |                                              |          |             |          |                                                    |          |              |          |
| <b>control, 4h (n=20)</b>                           | Actual                                       |          | Actual      |          | Actual                                             |          | Actual       |          |
| Predicted                                           | <0.8 (-)                                     | ≥0.8 (-) | <0.8 (-)    | ≥0.8 (-) | <0.8 (-)                                           | ≥0.8 (-) | <0.8 (-)     | ≥0.8 (-) |
| <0.8 (-)                                            | 9                                            | 1        | 10          | 0        | 11                                                 | 1        | 11           | 0        |
| ≥0.8 (-)                                            | 2                                            | 8        | 1           | 9        | 0                                                  | 8        | 0            | 9        |
| Accuracy %                                          | 81,82                                        | 88,89    | 90,91       | 100,00   | 100,00                                             | 88,89    | 100,00       | 100,00   |
| <b>Overall accuracy %</b>                           | <b>85,4</b>                                  |          | <b>95,5</b> |          | <b>94,4</b>                                        |          | <b>100,0</b> |          |
| <b>all, 4h (n=40)</b>                               | Actual                                       |          | Actual      |          | Actual                                             |          | Actual       |          |
| Predicted                                           | <0.8 (-)                                     | ≥0.8 (-) | <0.8 (-)    | ≥0.8 (-) | <0.8 (-)                                           | ≥0.8 (-) | <0.8 (-)     | ≥0.8 (-) |
| <0.8 (-)                                            | 20                                           | 4        | 21          | 8        | 19                                                 | 5        | 19           | 3        |
| ≥0.8 (-)                                            | 5                                            | 11       | 4           | 7        | 6                                                  | 10       | 6            | 12       |
| Accuracy %                                          | 80,00                                        | 73,33    | 84,00       | 46,67    | 76,00                                              | 66,67    | 76,00        | 80,00    |
| <b>Overall accuracy %</b>                           | <b>76,7</b>                                  |          | <b>65,3</b> |          | <b>71,3</b>                                        |          | <b>78,0</b>  |          |

**Table S3.** Confusion matrix incl. classification rates of immune system-related data (balanced).

| Spectral range:<br>Classifier:                               | Protein region (1800-1500 cm <sup>-1</sup> ) |                         |                       |                         | Polysaccharide region (1200-800 cm <sup>-1</sup> ) |                         |                       |                         |
|--------------------------------------------------------------|----------------------------------------------|-------------------------|-----------------------|-------------------------|----------------------------------------------------|-------------------------|-----------------------|-------------------------|
|                                                              | PCA-LDA                                      |                         | PCA-MDA               |                         | PCA-LDA                                            |                         | PCA-MDA               |                         |
| <b>IL-8 (&lt;math&gt;\geq 3\text{ pg/mL}&lt;/math&gt;)</b>   |                                              |                         |                       |                         |                                                    |                         |                       |                         |
| control, 4h (n=20)                                           | Actual                                       |                         | Actual                |                         | Actual                                             |                         | Actual                |                         |
| Predicted                                                    | $\geq 3\text{ pg/mL}$                        | $< 3\text{ pg/mL}$      | $\geq 3\text{ pg/mL}$ | $< 3\text{ pg/mL}$      | $\geq 3\text{ pg/mL}$                              | $< 3\text{ pg/mL}$      | $\geq 3\text{ pg/mL}$ | $< 3\text{ pg/mL}$      |
| $\geq 3\text{ pg/mL}$                                        | 6                                            | 2                       | 11                    | 3                       | 6                                                  | 2                       | 11                    | 3                       |
| $< 3\text{ pg/mL}$                                           | 5                                            | 7                       | 0                     | 6                       | 5                                                  | 7                       | 0                     | 6                       |
| Accuracy %                                                   | 54,5                                         | 77,8                    | 100,0                 | 66,7                    | 54,5                                               | 77,8                    | 100,0                 | 66,7                    |
| Overall accuracy %                                           | 66,2                                         |                         | 83,3                  |                         | 66,2                                               |                         | 83,3                  |                         |
| all, 4h (n=40)                                               | Actual                                       |                         | Actual                |                         | Actual                                             |                         | Actual                |                         |
| Predicted                                                    | $\geq 3\text{ pg/mL}$                        | $< 3\text{ pg/mL}$      | $\geq 3\text{ pg/mL}$ | $< 3\text{ pg/mL}$      | $\geq 3\text{ pg/mL}$                              | $< 3\text{ pg/mL}$      | $\geq 3\text{ pg/mL}$ | $< 3\text{ pg/mL}$      |
| $\geq 3\text{ pg/mL}$                                        | 12                                           | 7                       | 23                    | 11                      | 15                                                 | 6                       | 24                    | 13                      |
| $< 3\text{ pg/mL}$                                           | 15                                           | 6                       | 4                     | 2                       | 12                                                 | 7                       | 3                     | 0                       |
| Accuracy %                                                   | 44,4                                         | 46,2                    | 85,2                  | 15,4                    | 55,6                                               | 53,8                    | 88,9                  | 0,0                     |
| Overall accuracy %                                           | 45,3                                         |                         | 50,3                  |                         | 54,7                                               |                         | 44,4                  |                         |
| <b>IL-6 (&lt;math&gt;\geq 200\text{ pg/mL}&lt;/math&gt;)</b> |                                              |                         |                       |                         |                                                    |                         |                       |                         |
| control, 4h (n=20)                                           | Actual                                       |                         | Actual                |                         | Actual                                             |                         | Actual                |                         |
| Predicted                                                    | $< 200\text{ pg/mL}$                         | $\geq 200\text{ pg/mL}$ | $< 200\text{ pg/mL}$  | $\geq 200\text{ pg/mL}$ | $< 200\text{ pg/mL}$                               | $\geq 200\text{ pg/mL}$ | $< 200\text{ pg/mL}$  | $\geq 200\text{ pg/mL}$ |
| $< 200\text{ pg/mL}$                                         | 13                                           | 2                       | 13                    | 7                       | 11                                                 | 2                       | 13                    | 7                       |
| $\geq 200\text{ pg/mL}$                                      | 0                                            | 5                       | 0                     | 0                       | 2                                                  | 5                       | 0                     | 0                       |
| Accuracy %                                                   | 100,00                                       | 71,43                   | 100,00                | 0,00                    | 84,62                                              | 71,43                   | 100,00                | 0,00                    |
| Overall accuracy %                                           | 85,7                                         |                         | 50,0                  |                         | 78,0                                               |                         | 50,0                  |                         |
| all, 4h (n=40)                                               | Actual                                       |                         | Actual                |                         | Actual                                             |                         | Actual                |                         |
| Predicted                                                    | $< 200\text{ pg/mL}$                         | $\geq 200\text{ pg/mL}$ | $< 200\text{ pg/mL}$  | $\geq 200\text{ pg/mL}$ | $< 200\text{ pg/mL}$                               | $\geq 200\text{ pg/mL}$ | $< 200\text{ pg/mL}$  | $\geq 200\text{ pg/mL}$ |
| $< 200\text{ pg/mL}$                                         | 21                                           | 4                       | 23                    | 8                       | 24                                                 | 6                       | 23                    | 8                       |
| $\geq 200\text{ pg/mL}$                                      | 7                                            | 8                       | 5                     | 4                       | 4                                                  | 6                       | 5                     | 4                       |
| Accuracy %                                                   | 75,00                                        | 66,67                   | 82,14                 | 33,33                   | 85,71                                              | 50,00                   | 82,14                 | 33,33                   |
| Overall accuracy %                                           | 70,8                                         |                         | 57,7                  |                         | 67,9                                               |                         | 57,7                  |                         |
| <b>Hsp-72 (&lt;math&gt;\geq 0,5\text{ AU}&lt;/math&gt;)</b>  |                                              |                         |                       |                         |                                                    |                         |                       |                         |
| control, 4h (n=20)                                           | Actual                                       |                         | Actual                |                         | Actual                                             |                         | Actual                |                         |
| Predicted                                                    | $< 0,5\text{ AU}$                            | $\geq 0,5\text{ AU}$    | $< 0,5\text{ AU}$     | $\geq 0,5\text{ AU}$    | $< 0,5\text{ AU}$                                  | $\geq 0,5\text{ AU}$    | $< 0,5\text{ AU}$     | $\geq 0,5\text{ AU}$    |
| $< 0,5\text{ AU}$                                            | 9                                            | 0                       | 9                     | 0                       | 7                                                  | 2                       | 9                     | 0                       |
| $\geq 0,5\text{ AU}$                                         | 0                                            | 11                      | 0                     | 11                      | 2                                                  | 9                       | 0                     | 11                      |
| Accuracy %                                                   | 100,00                                       | 100,00                  | 100,00                | 100,00                  | 77,78                                              | 81,82                   | 100,00                | 100,00                  |
| Overall accuracy %                                           | 100,0                                        |                         | 100,0                 |                         | 79,8                                               |                         | 100,0                 |                         |
| all, 4h (n=40)                                               | Actual                                       |                         | Actual                |                         | Actual                                             |                         | Actual                |                         |
| Predicted                                                    | $< 0,5\text{ AU}$                            | $\geq 0,5\text{ AU}$    | $< 0,5\text{ AU}$     | $\geq 0,5\text{ AU}$    | $< 0,5\text{ AU}$                                  | $\geq 0,5\text{ AU}$    | $< 0,5\text{ AU}$     | $\geq 0,5\text{ AU}$    |
| $< 0,5\text{ AU}$                                            | 9                                            | 6                       | 7                     | 12                      | 6                                                  | 8                       | 10                    | 9                       |
| $\geq 0,5\text{ AU}$                                         | 8                                            | 17                      | 10                    | 11                      | 11                                                 | 15                      | 7                     | 14                      |
| Accuracy %                                                   | 52,94                                        | 73,91                   | 41,18                 | 47,83                   | 35,29                                              | 65,22                   | 58,82                 | 60,87                   |
| Overall accuracy %                                           | 63,4                                         |                         | 44,5                  |                         | 50,3                                               |                         | 59,8                  |                         |
| <b>Previous peritonitis (yes/no)</b>                         |                                              |                         |                       |                         |                                                    |                         |                       |                         |
| control, 4h (n=20)                                           | Actual                                       |                         | Actual                |                         | Actual                                             |                         | Actual                |                         |
| Predicted                                                    | Yes                                          | No                      | Yes                   | No                      | Yes                                                | No                      | Yes                   | No                      |
| Yes                                                          | n.D.                                         |                         | n.D.                  |                         | n.D.                                               |                         | n.D.                  |                         |
| No                                                           |                                              |                         |                       |                         |                                                    |                         |                       |                         |
| Accuracy %                                                   |                                              |                         |                       |                         |                                                    |                         |                       |                         |
| Overall accuracy %                                           |                                              |                         |                       |                         |                                                    |                         |                       |                         |
| all, 4h (n=40)                                               | Actual                                       |                         | Actual                |                         | Actual                                             |                         | Actual                |                         |
| Predicted                                                    | Yes                                          | No                      | Yes                   | No                      | Yes                                                | No                      | Yes                   | No                      |
| Yes                                                          | 4                                            | 10                      | 0                     | 1                       | 6                                                  | 8                       | 1                     | 2                       |
| No                                                           | 6                                            | 20                      | 10                    | 29                      | 4                                                  | 22                      | 9                     | 28                      |
| Accuracy %                                                   | 40,00                                        | 66,67                   | 0,00                  | 96,67                   | 60,00                                              | 73,33                   | 10,00                 | 93,33                   |
| Overall accuracy %                                           | 53,3                                         |                         | 48,3                  |                         | 66,7                                               |                         | 51,7                  |                         |
